# Supplementary figures and images for: Workforce attachment after a congenital long QT syndrome diagnosis: a Danish nationwide study
Source: HighWire-hosted journal article supplement (doi:10.1136/openhrt-2022-002056), 2022-07-01

**VISUAL SUMMARY Workforce attachment after a diagnosis with cLQTS**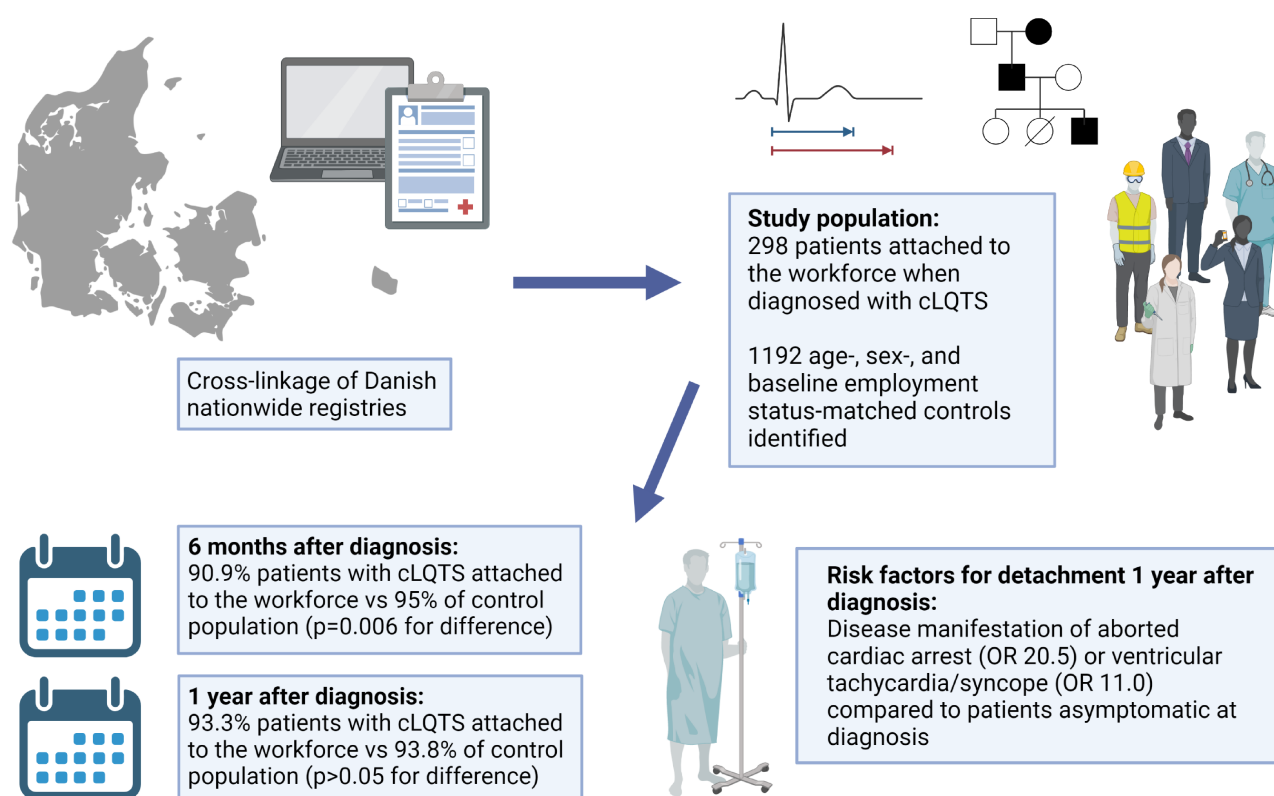

Supplement: openhrt-2022-002056supp002_data_supplement.pdf [file openhrt-2022-002056supp002_data_supplement.pdf]
